# Supplementary material for: Push–pull (thio)barbituric acid derivatives in dye photosensitized radical and cationic polymerization reactions under 457/473 nm laser beams or blue LEDs
Source: Royal Society of Chemistry journal article supplement (doi:10.1039/c3py00372h), 2013-01-01

## Supporting Information:

**Figure 1.** Bakhshiev's (a), Lippert–Mataga (b), Kawski–Chamma–Viallet's (c), McRae's (d) and Suppan's (e) solvatochromic correlation plots for **D\_1** in seven solvents of different polarities and R-square of the corresponding linear fits. Chloroform and dichloromethane have been omitted for linear regression.

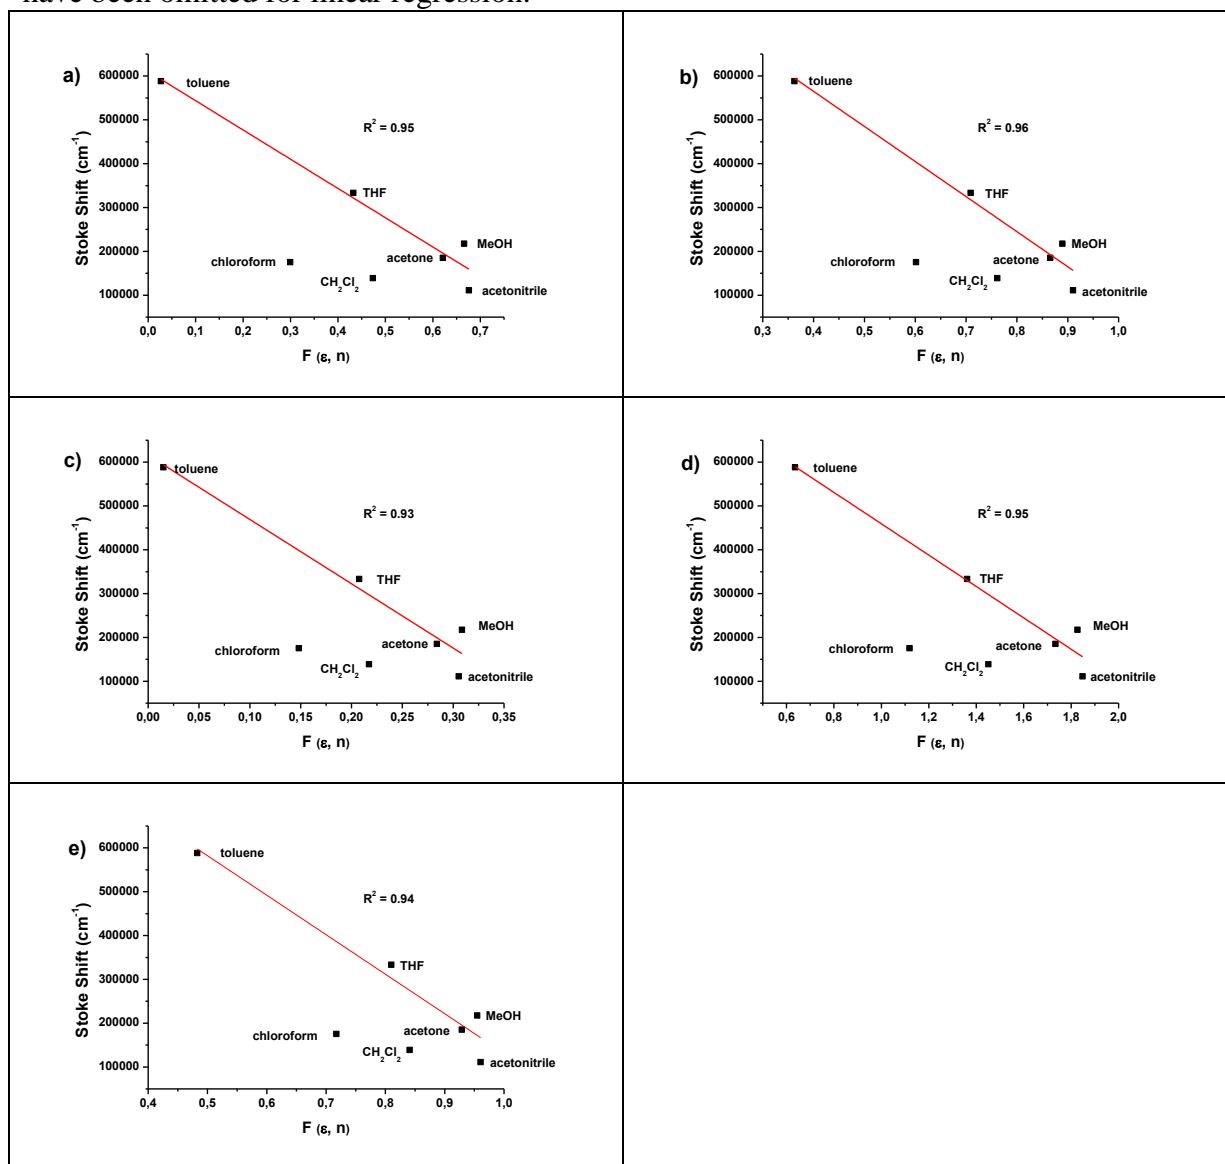

**Figure 2.** Bakhshiev's (a), Lippert–Mataga (b), Kawski–Chamma–Viallet's (c), McRae's (d) and Suppan's (e) solvatochromic correlation plots for **D**<sub>2</sub> in seven solvents of different polarities and R-square of the corresponding linear fits.

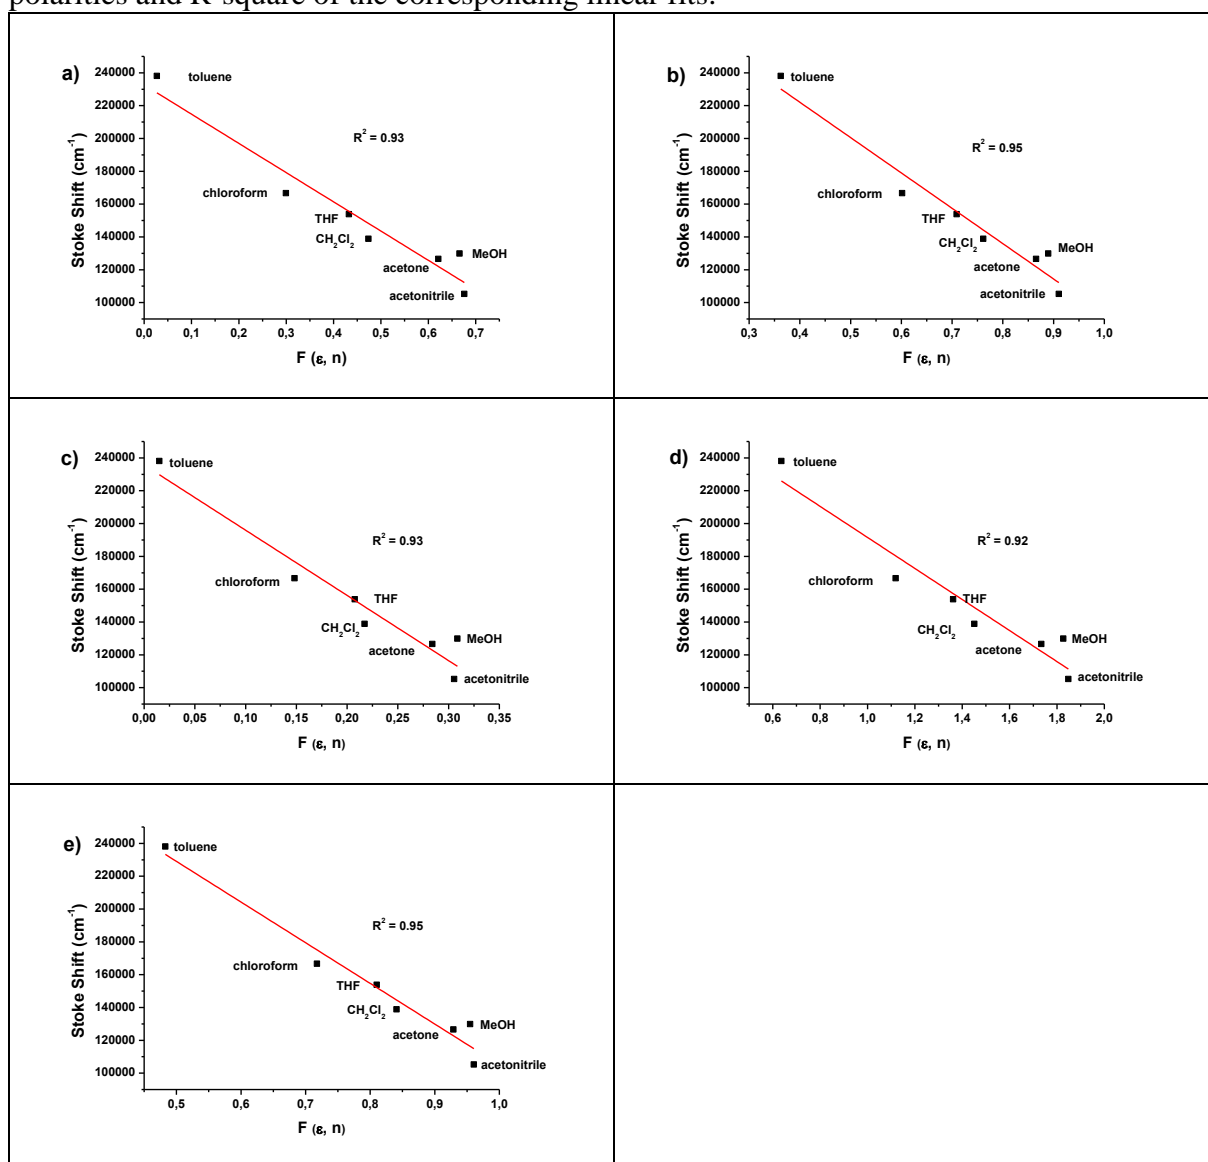

**Figure 3.** Kinetic recorded at 460 nm for the laser excitation of **D\_2** at 355 nm (in acetonitrile under N<sub>2</sub>); the sharpe negative peak is ascribed to the fluorescence of **D\_2**.

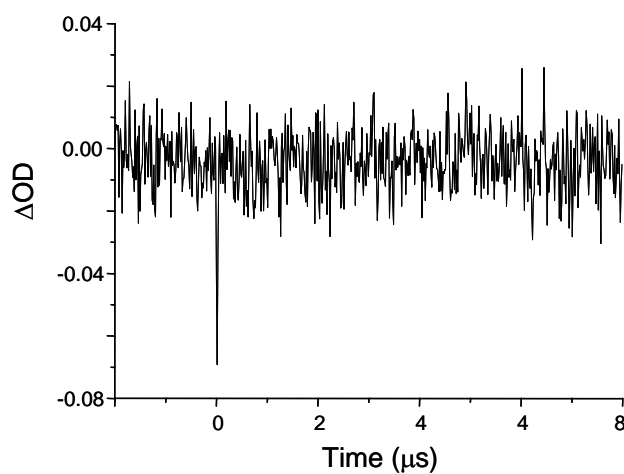

**Figure 4.** Photopolymerization profiles of **EPOX** under air. Upon a halogen lamp irradiation in the presence of (1) **D\_2/Ph<sub>2</sub>I<sup>+</sup>** (0.3%/2% w/w); (2) **D\_2/NVK/Ph<sub>2</sub>I<sup>+</sup>** (0.3%/3%/2% w/w).

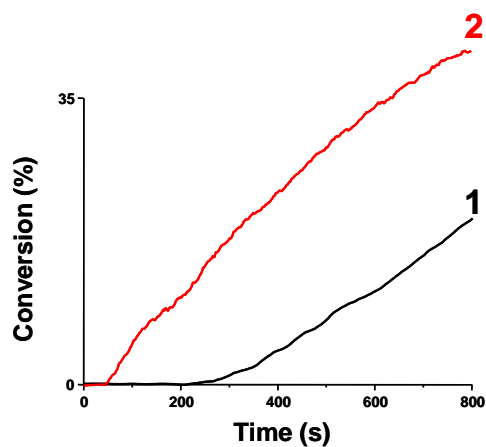

Supplement: c3py00372h.pdf [file c3py00372h.pdf]
